# Supplementary material
Source: Springer Nature journal article supplement (https://www.springermedizin.de/resource/supplementary/12889_2010_3088_MOESM2_ESM.pdf/9488140)

a Overall suicide E+W 1966-1992

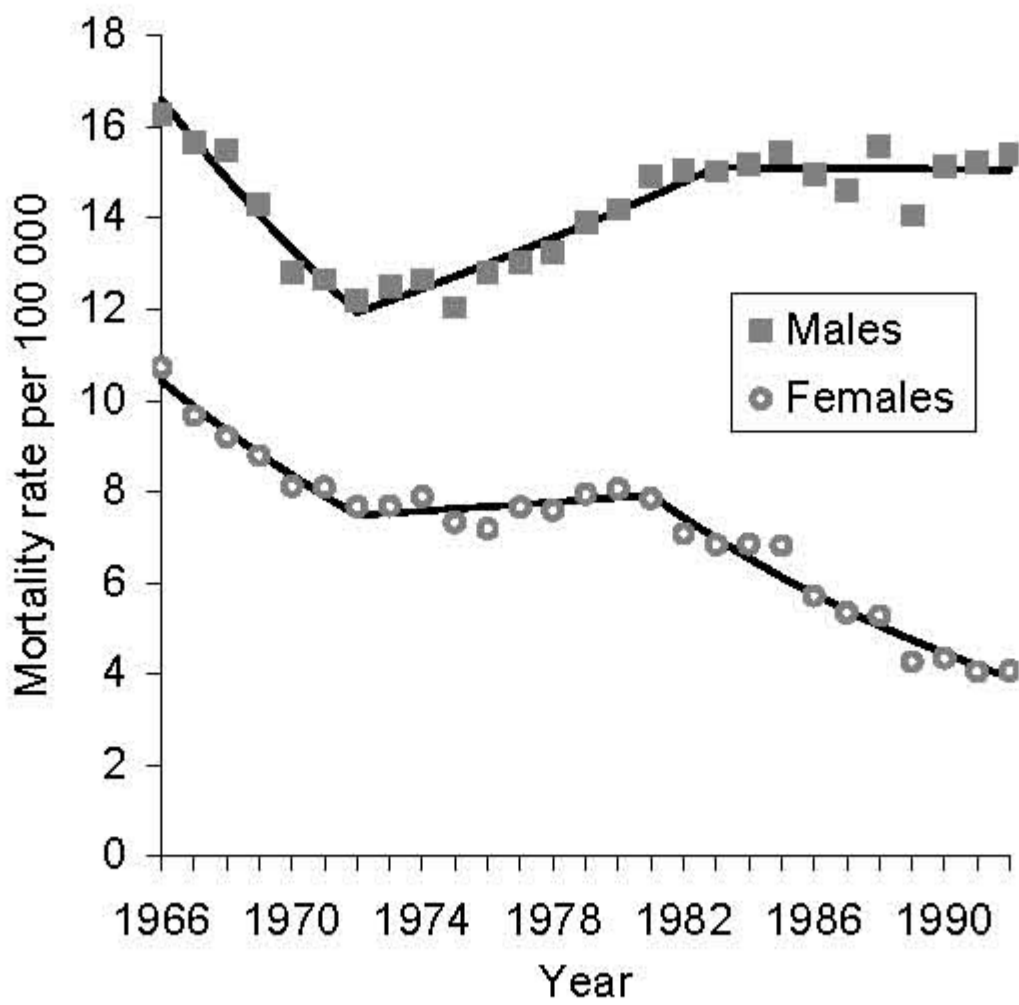

d Overall suicide Taiwan 1987-2007

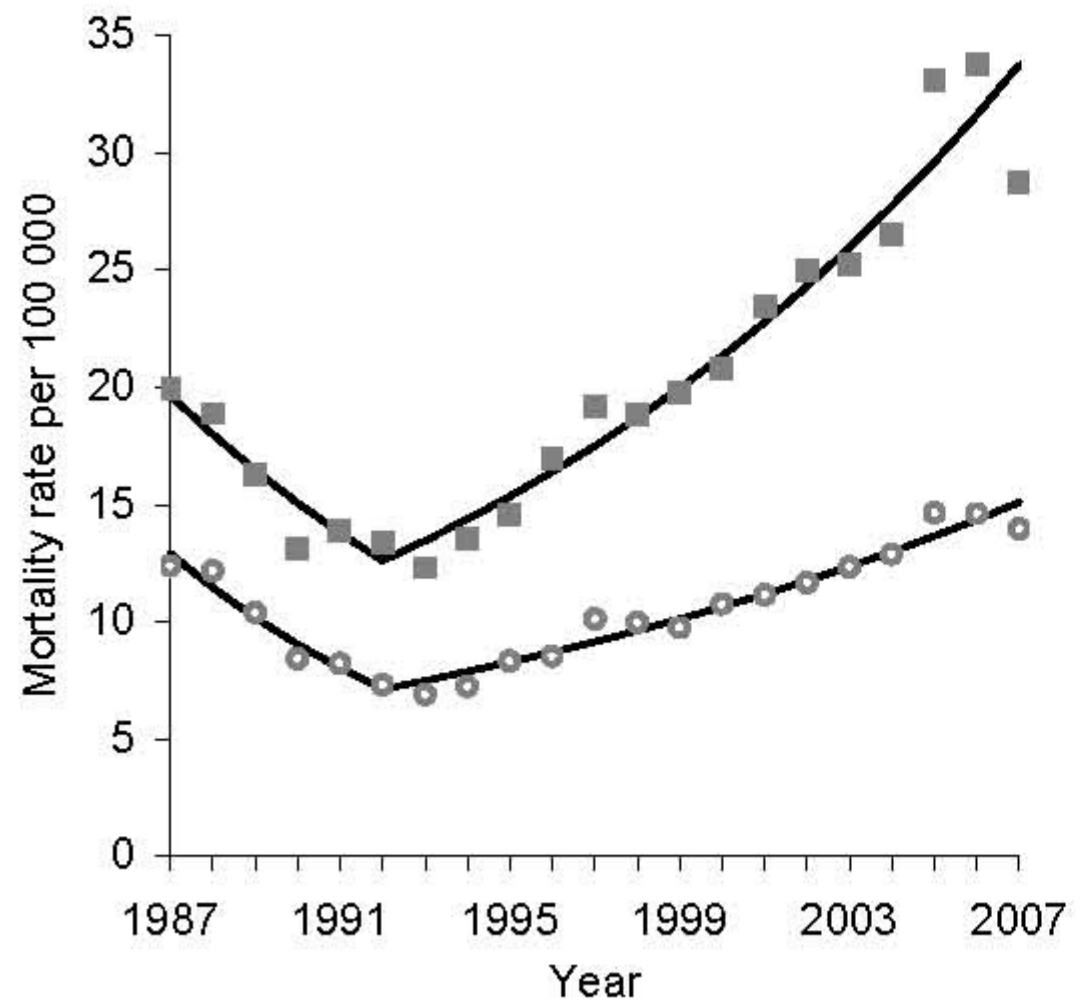

b Gassing suicide E+W 1966-1992

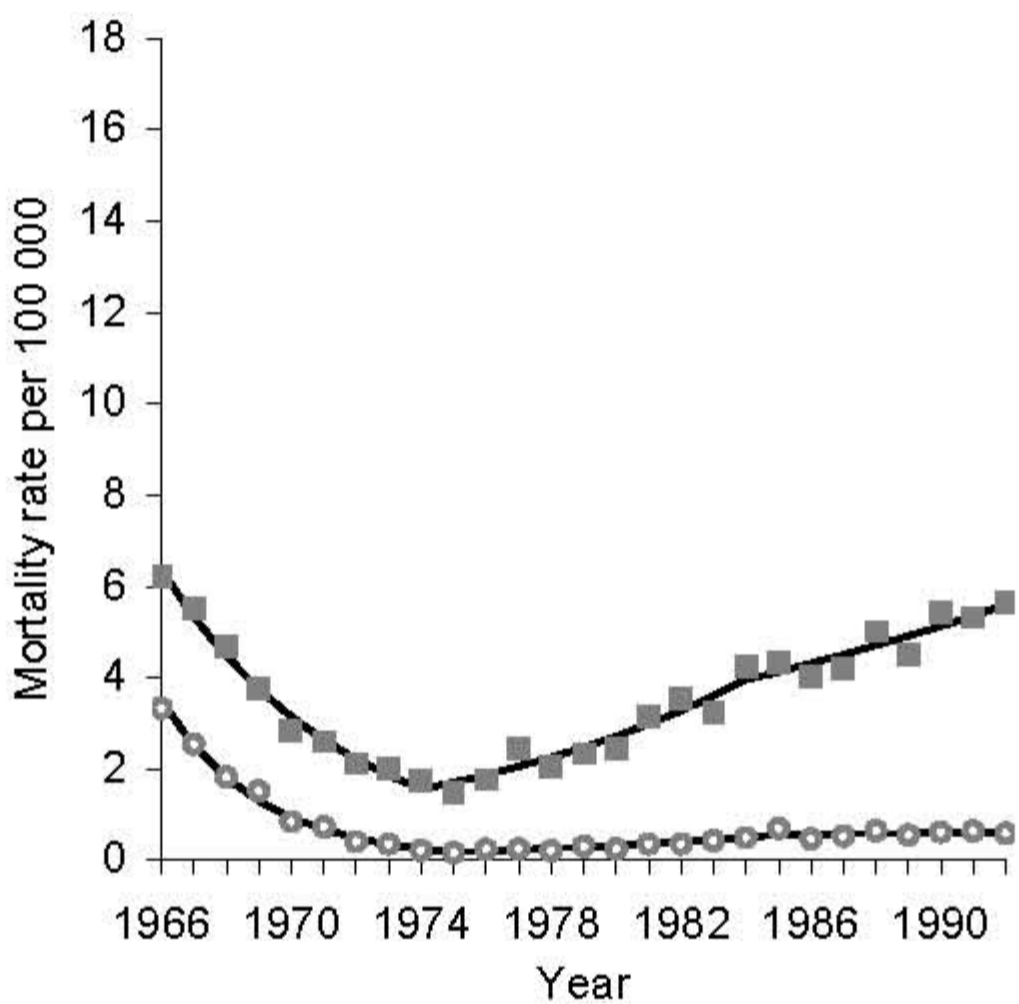

e Gassing suicide Taiwan 1987-2007

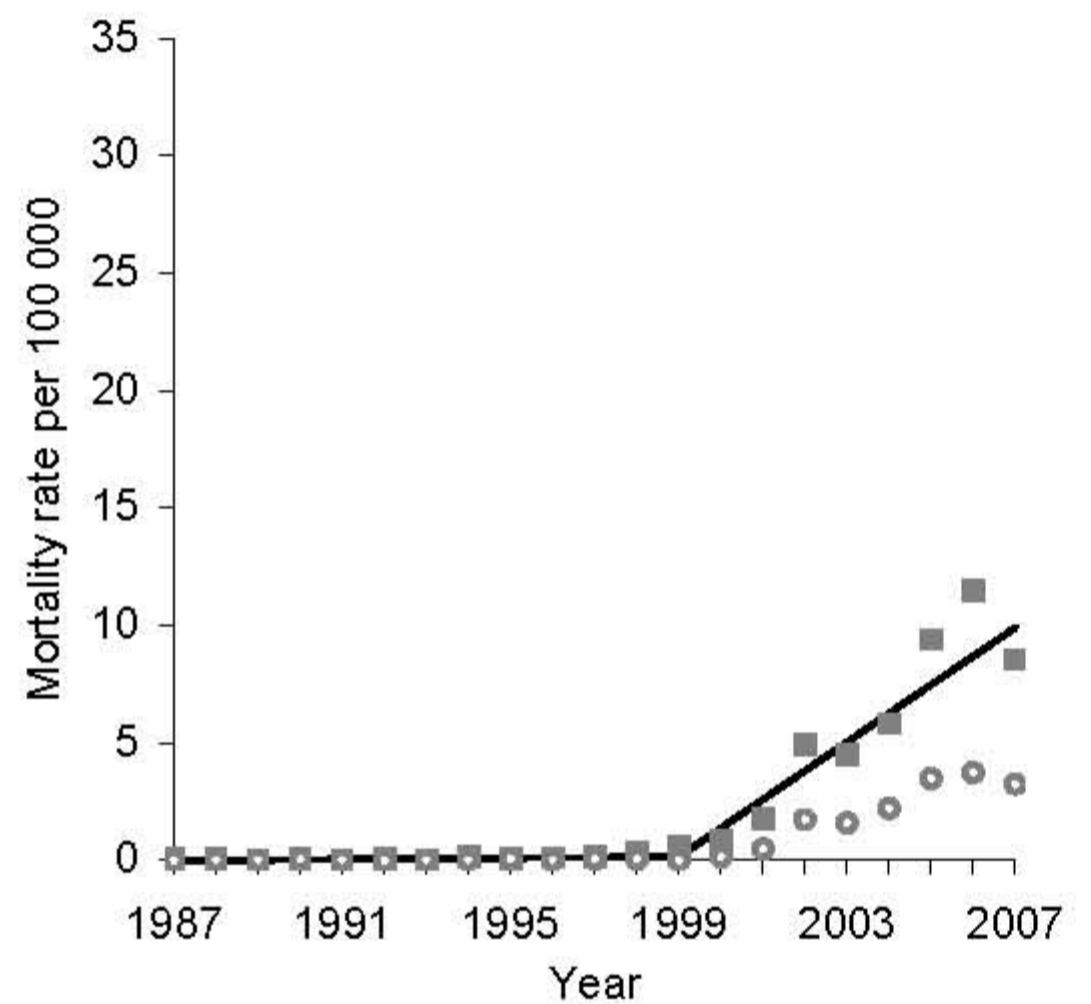

c Non-gassing suicide E+W 1966-1992

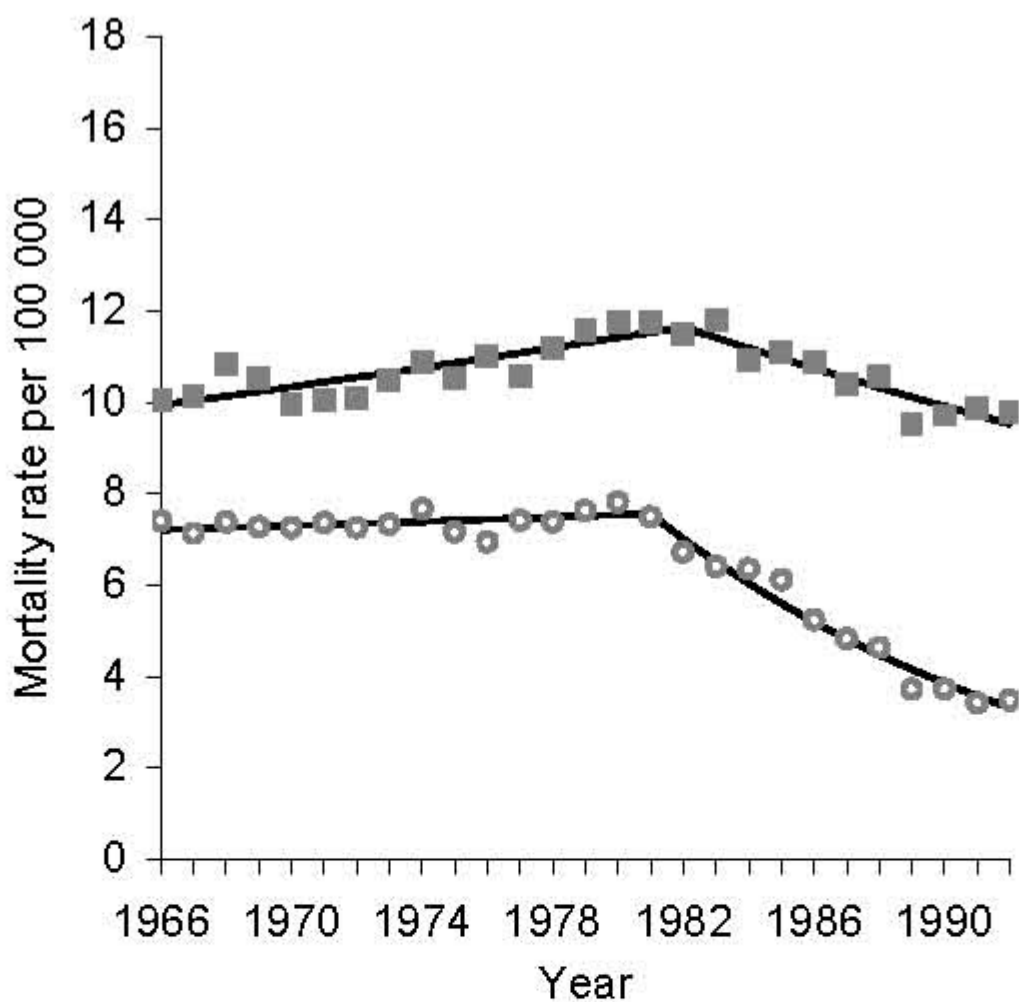

f Non-gassing suicide Taiwan 1987-2007

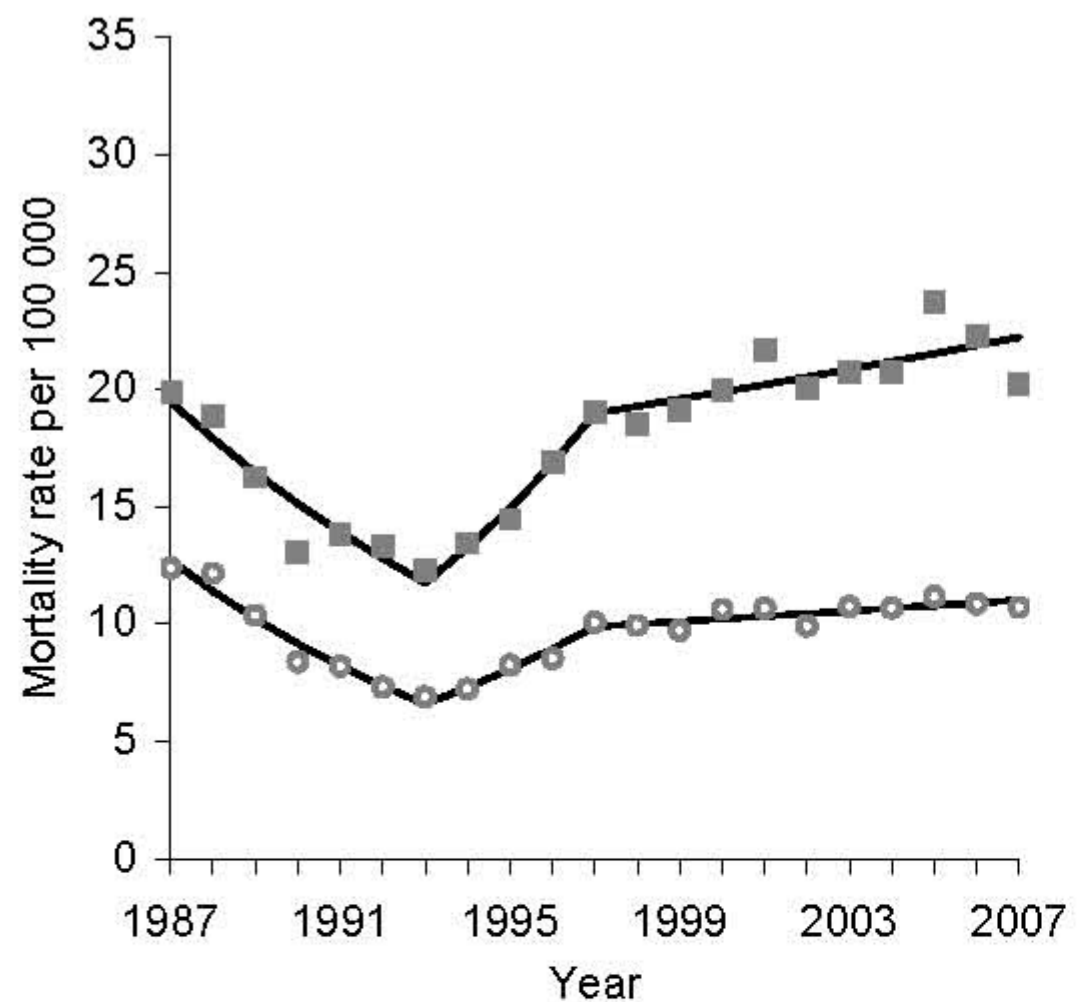

Supplement: MOESM2 [file 9488140]
